# Supplementary material for: Enzymatic synthesis of 2′-methylseleno-modified RNA
Source: Royal Society of Chemistry journal article supplement (doi:10.1039/c1sc00404b), 2011-01-01
Supplement: c1sc00404b.pdf [file c1sc00404b.pdf]

## Supporting Information to

Enzymatic synthesis of 2'-methylseleno-modified RNA

Vanessa Siegmund,<sup>a</sup> Tobias Santner,<sup>b</sup> Ronald Micura,<sup>b</sup> Andreas Marx<sup>a</sup>

<sup>a</sup>*Department of Chemistry and Konstanz Research School Chemical Biology, University of Konstanz*

<sup>b</sup>*Institute of Organic Chemistry and Center for Molecular Biosciences (CMBI), University of Innsbruck*

---

## CONTENTS

### Supporting Figures

|                                                                                           |      |
|-------------------------------------------------------------------------------------------|------|
| Supporting Figure 1. <sup>1</sup> H- and <sup>13</sup> C-NMR spectra of compound <b>2</b> | -S2- |
| Supporting Figure 2. <sup>1</sup> H- and <sup>13</sup> C-NMR spectra of compound <b>3</b> | -S3- |
| Supporting Figure 3. <sup>1</sup> H- and <sup>13</sup> C-NMR spectra of compound <b>4</b> | -S4- |
| Supporting Figure 4. <sup>31</sup> P-NMR spectrum of compound <b>4</b>                    | -S5- |
| Supporting Figure 5. <sup>1</sup> H- and <sup>13</sup> C-NMR spectra of compound <b>6</b> | -S6- |
| Supporting Figure 6. <sup>1</sup> H- and <sup>13</sup> C-NMR spectra of compound <b>7</b> | -S7- |
| Supporting Figure 7. <sup>31</sup> P-NMR spectrum of compound <b>7</b>                    | -S8- |
| Supporting Figure 8. SDS-PAGE gel of purified T7 RNA polymerases                          | -S8- |

---

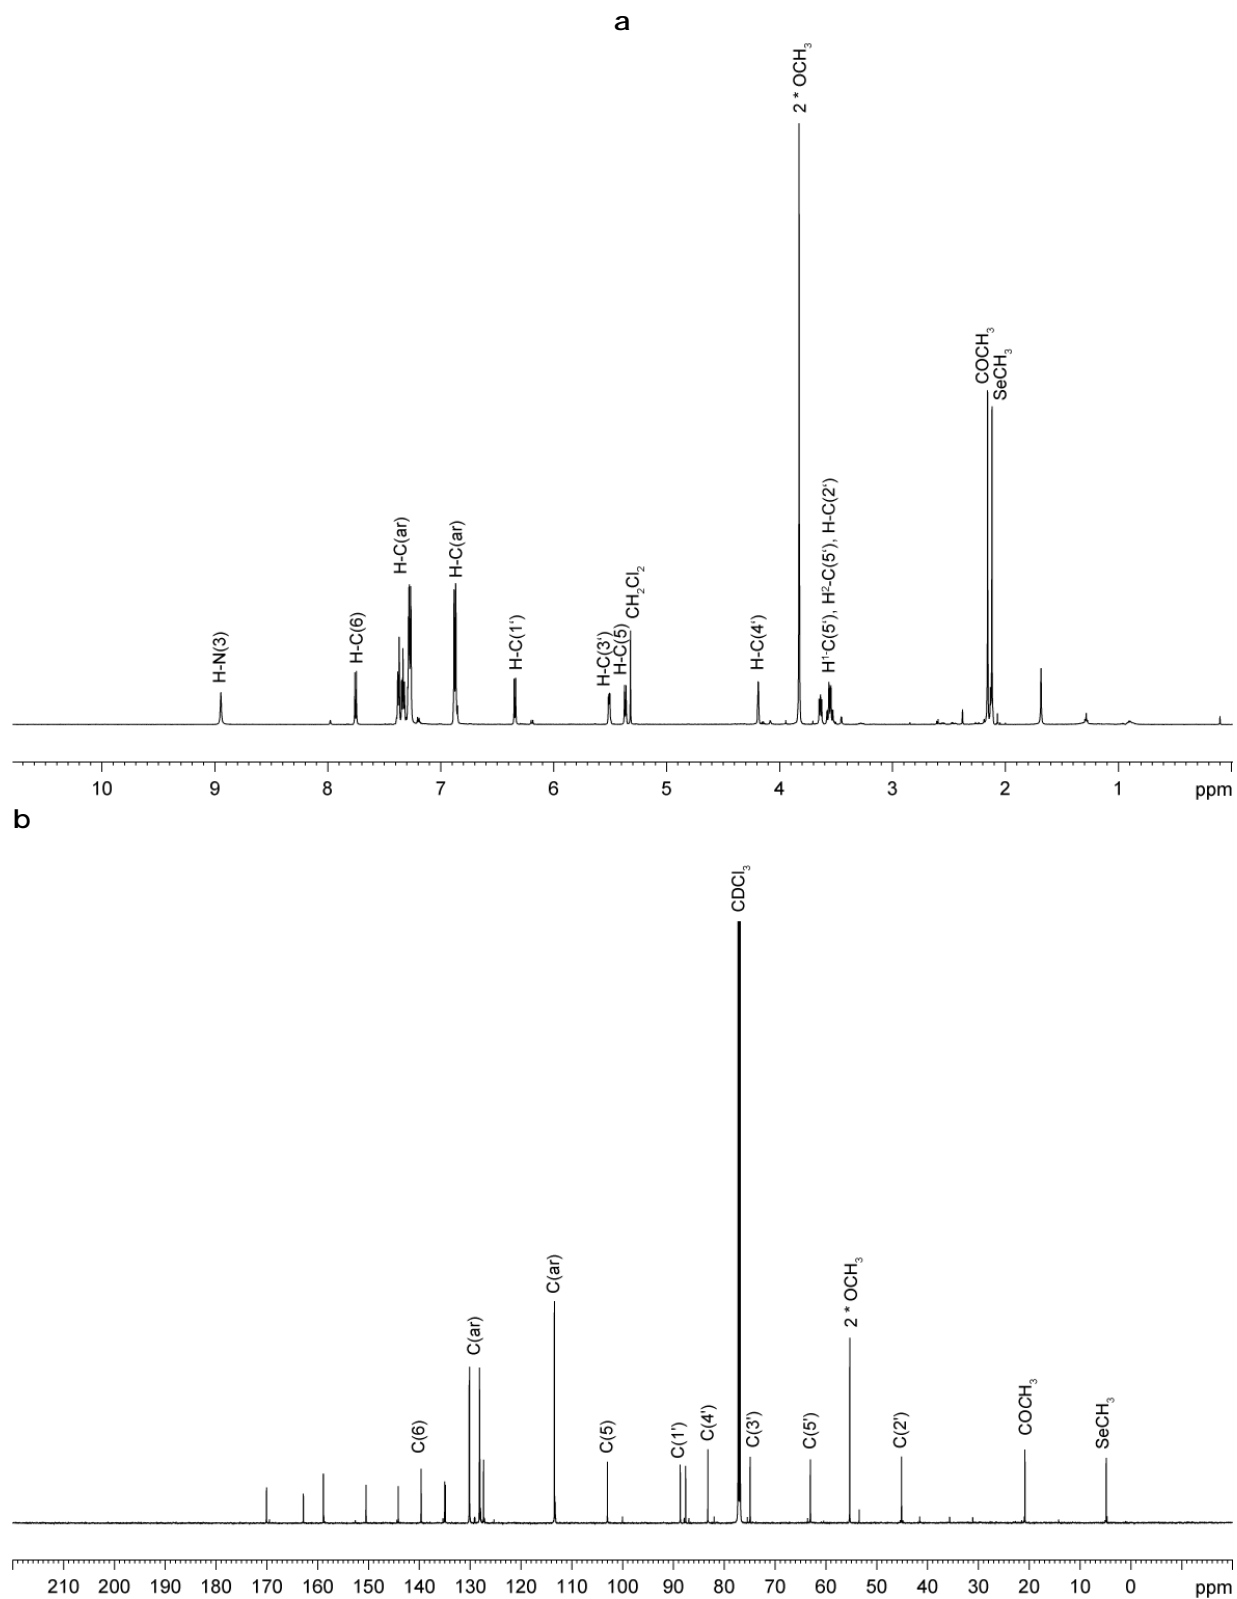

**Supporting Figure 1.** NMR spectra of 3'-acetyl-5'-*O*-(4,4'-dimethoxytrityl)-2'-methylseleno-2'-deoxyuridine (**2**). (a)  $^1\text{H}$ -NMR (300 MHz,  $\text{CDCl}_3$ ). (b)  $^{13}\text{C}$ -NMR (150 MHz,  $\text{CDCl}_3$ ).

a

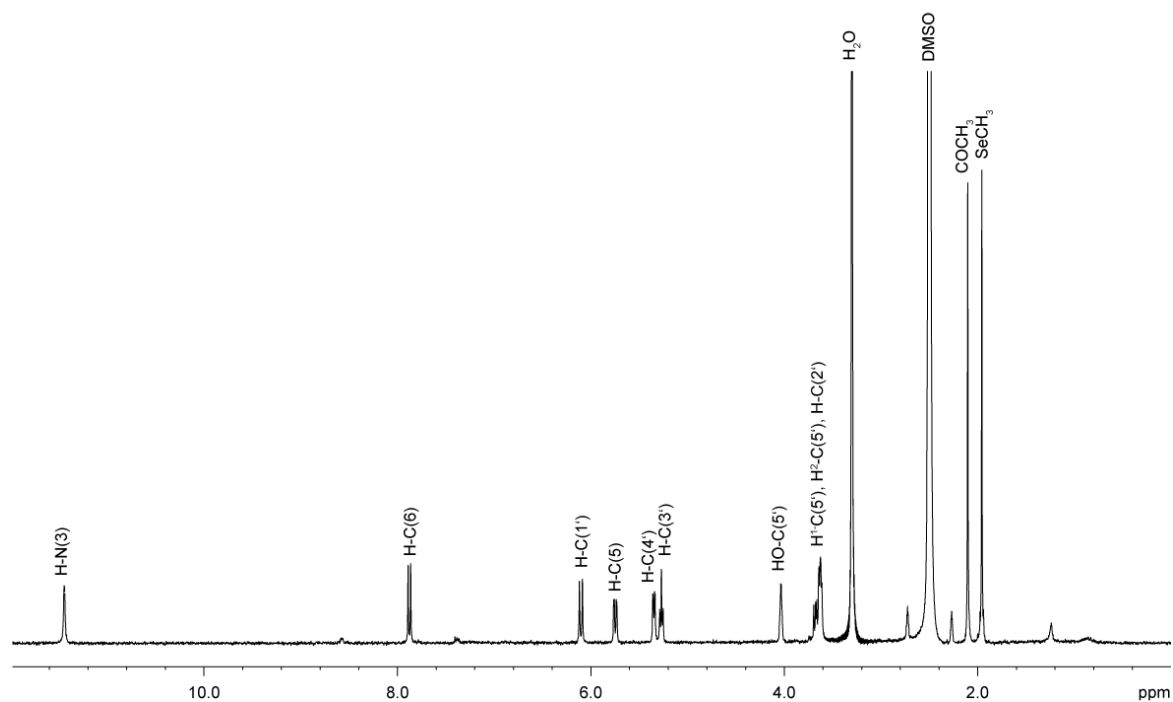

b

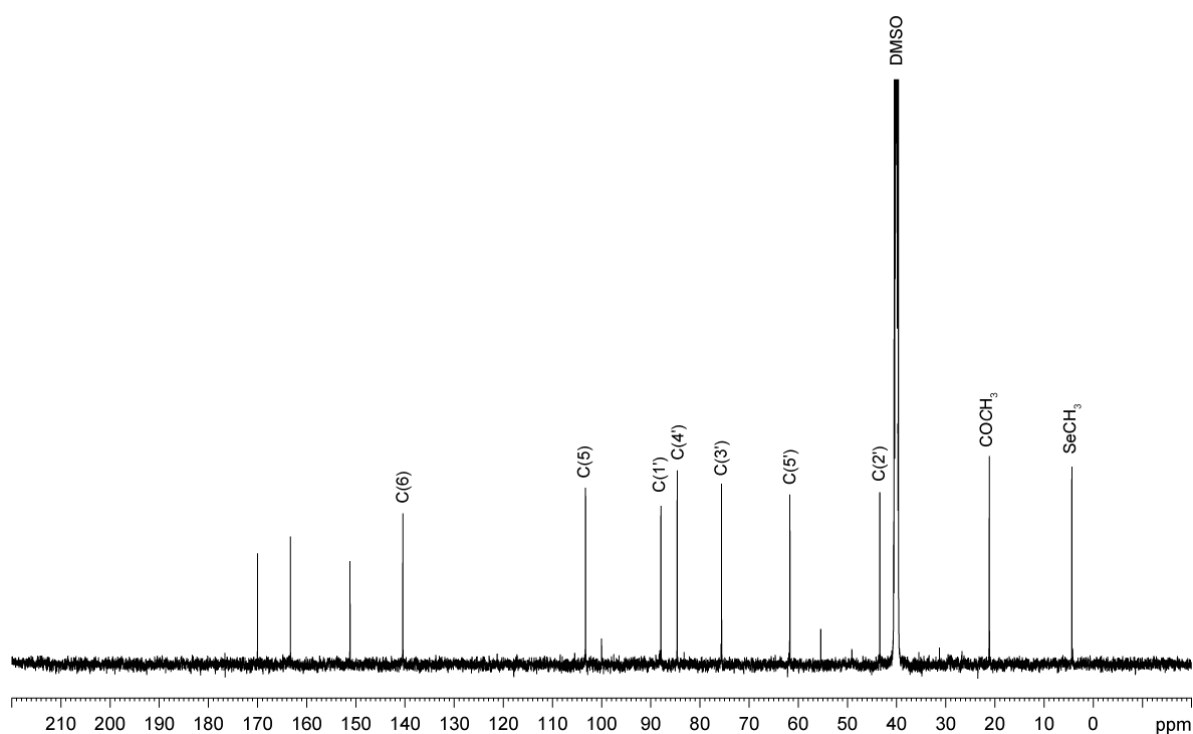

**Supporting Figure 2.** NMR spectra of 3'-acetyl-2'-methylseleno-2'-deoxyuridine (**3**).  
(a)  $^1\text{H}$ -NMR (300 MHz,  $\text{DMSO}-d_6$ ). (b)  $^{13}\text{C}$ -NMR (150 MHz,  $\text{DMSO}-d_6$ ).

a

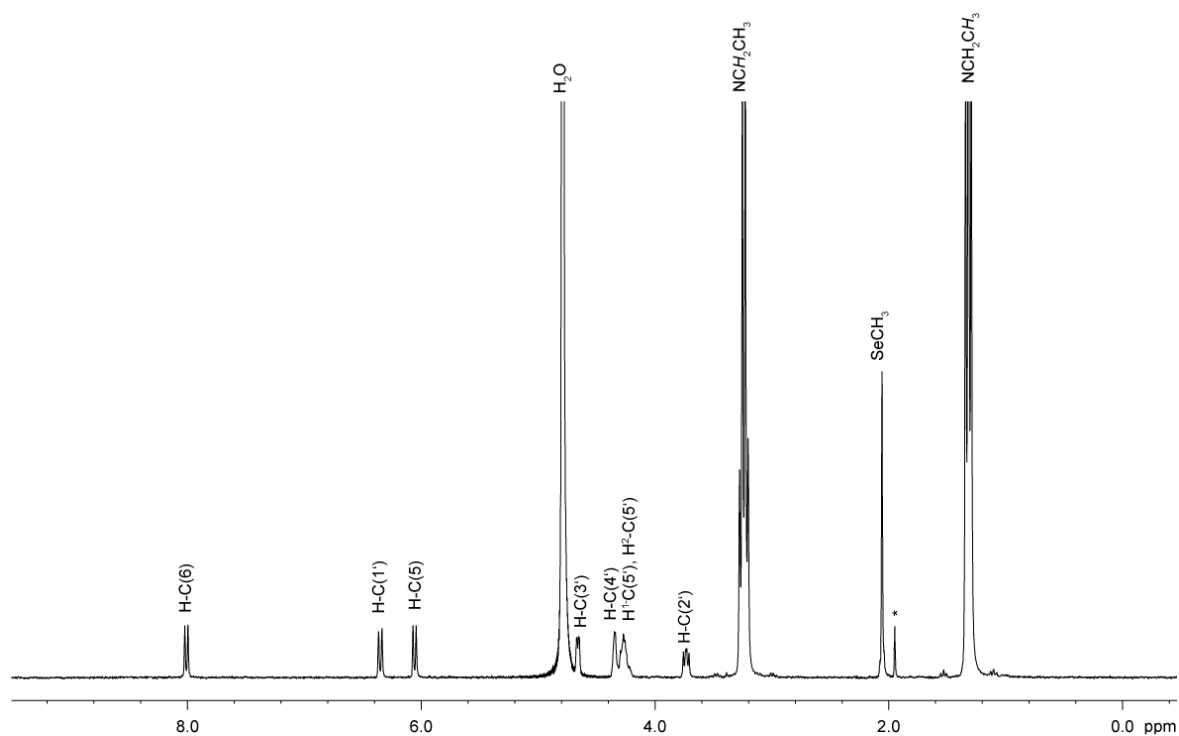

b

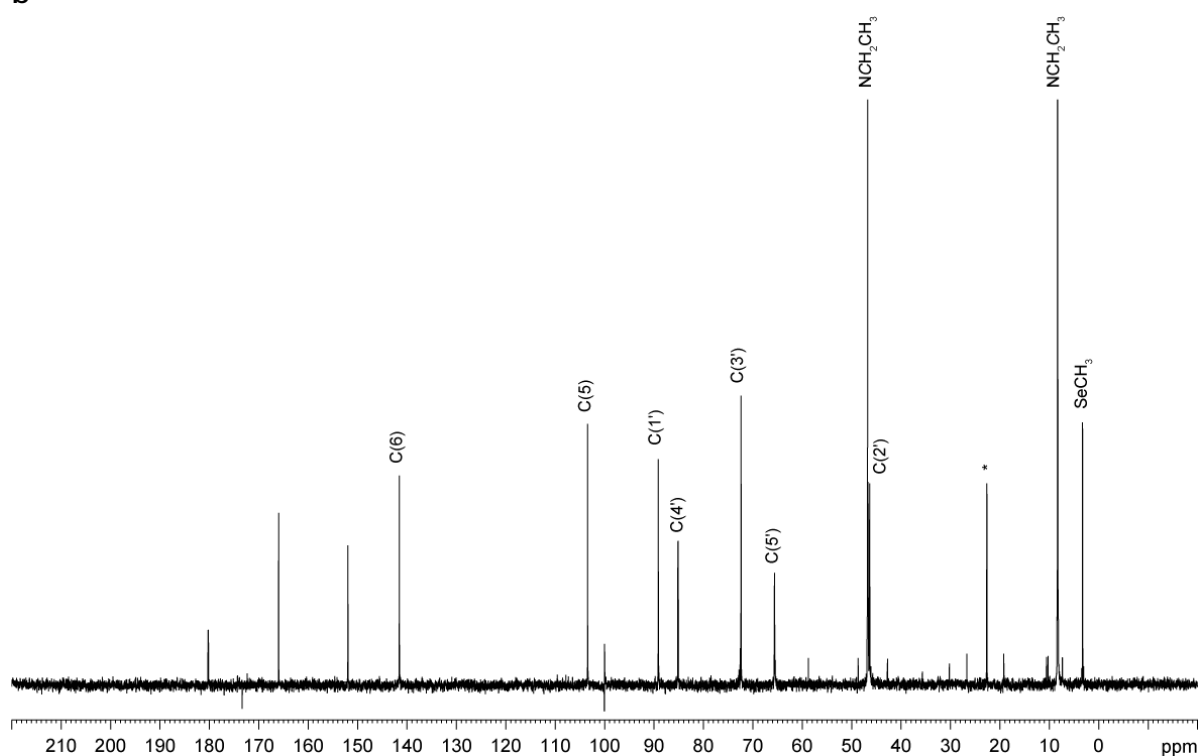

**Supporting Figure 3.** NMR spectra of 2'-methylseleno-2'-deoxyuridine 5'-triphosphate (**4**). (a)  $^1\text{H}$ -NMR (300 MHz,  $\text{D}_2\text{O}$ ). (b)  $^{13}\text{C}$ -NMR (150 MHz,  $\text{D}_2\text{O}$ ). \* Resonances flagged with an asterisk indicate residual amounts of acetate anion from TEAA buffer.

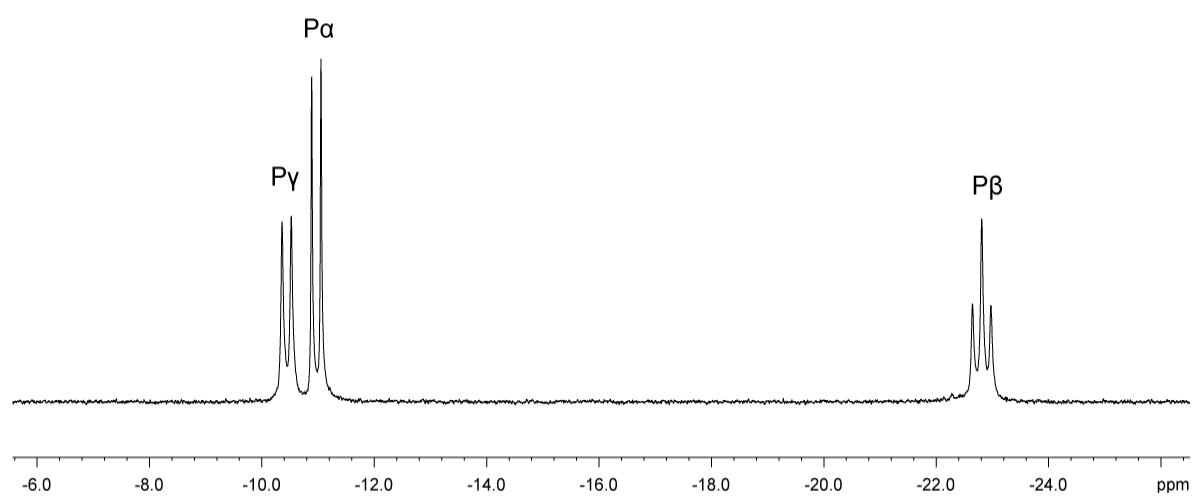

**Supporting Figure 4.**  $^{31}\text{P}$ -NMR spectrum (121 MHz,  $\text{D}_2\text{O}$ ) of 2'-methylseleno-2'-deoxyuridine 5'-triphosphate (**4**).

a

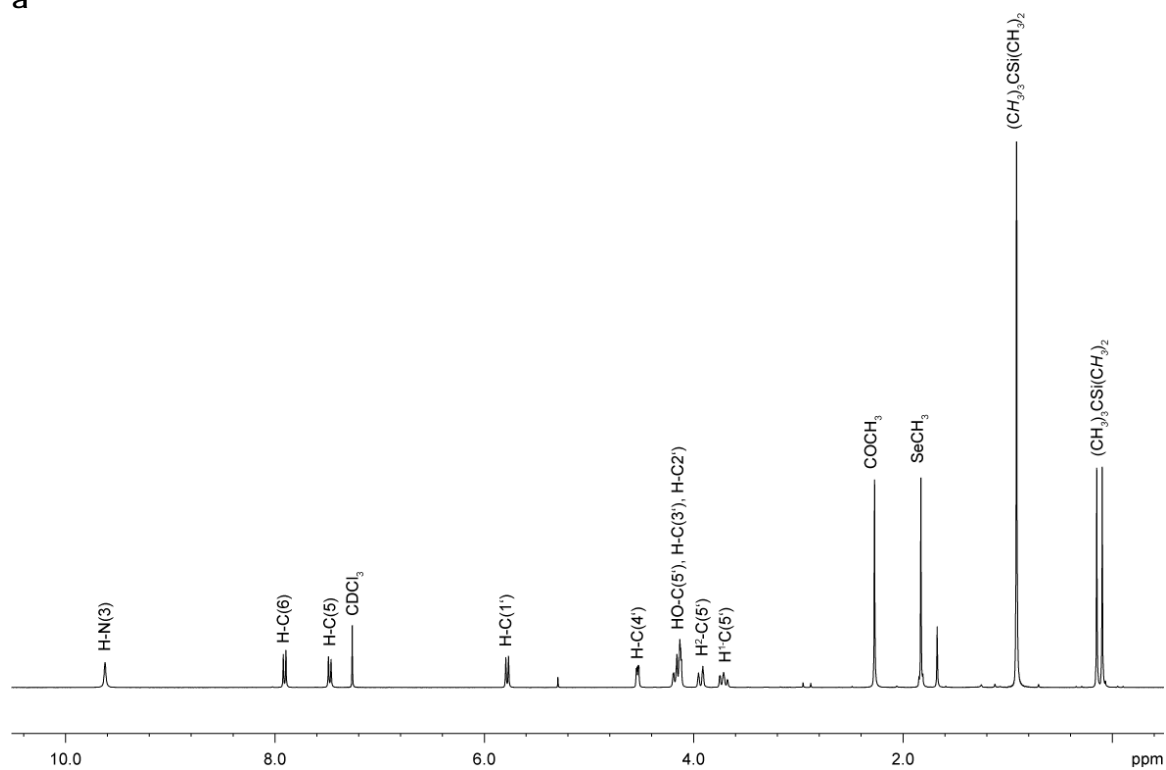

b

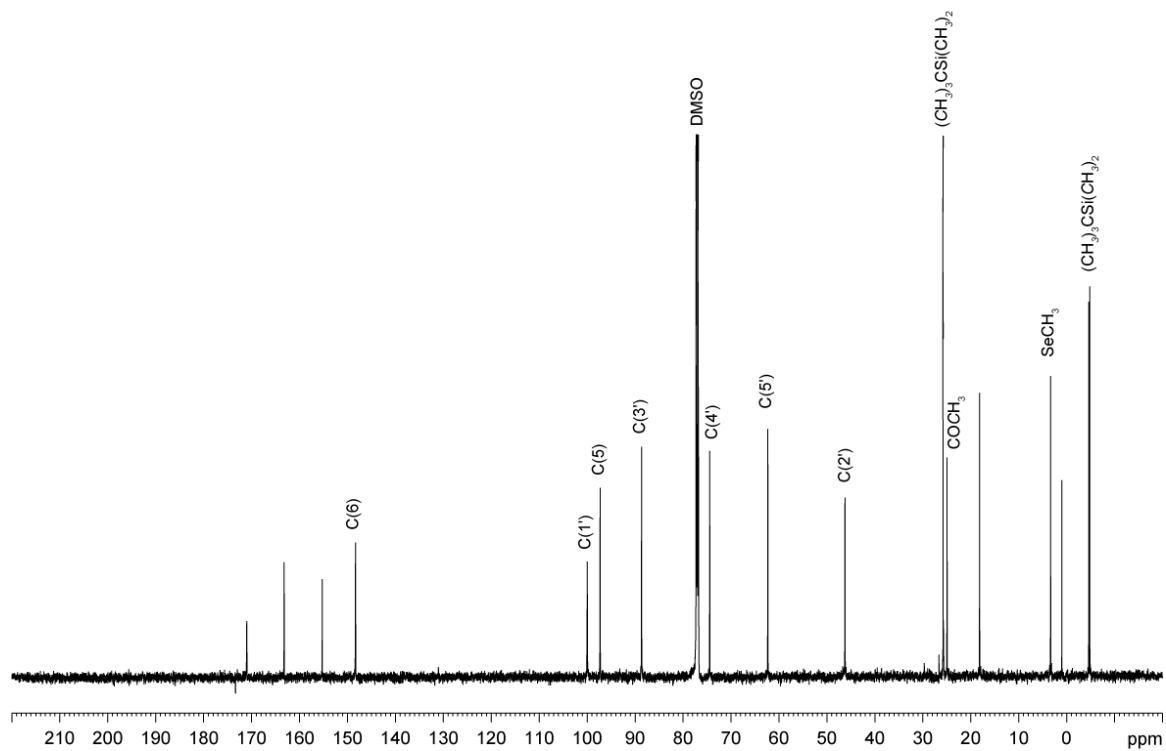

**Supporting Figure 5.** NMR spectra *N*<sup>4</sup>-acetyl-3'-tert.-butyldimethylsilyl-2'-methylseleno-2'-deoxycytidine (**6**). (a) <sup>1</sup>H-NMR (300 MHz, CDCl<sub>3</sub>). (b) <sup>13</sup>C-NMR (150 MHz, DMSO-*d*<sub>6</sub>).

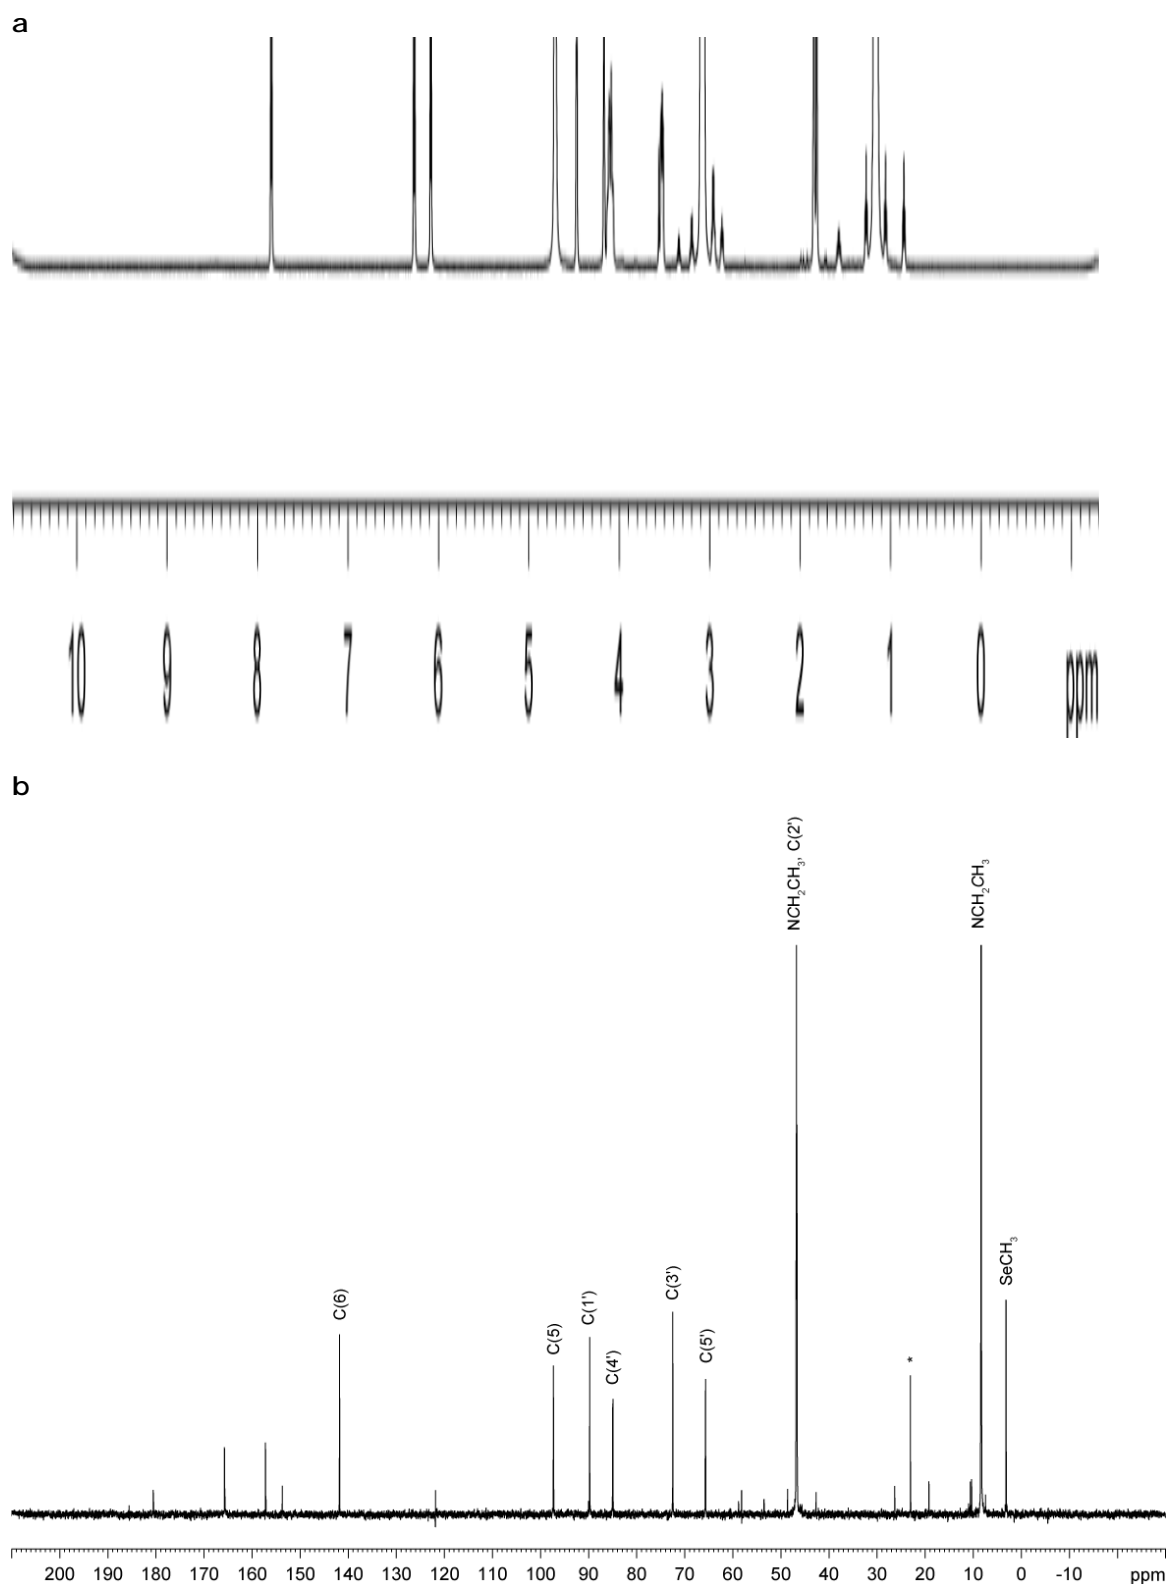

**Supporting Figure 6.** NMR spectra of 2'-methylseleno-2'-deoxycytidine 5'-triphosphate (**7**). (a)  $^1\text{H}$ -NMR (500 MHz,  $\text{D}_2\text{O}$ ). (b)  $^{13}\text{C}$ -NMR (150 MHz,  $\text{D}_2\text{O}$ ). \* Resonances flagged with an asterisk indicate residual amounts of acetate anion from HPLC buffer.

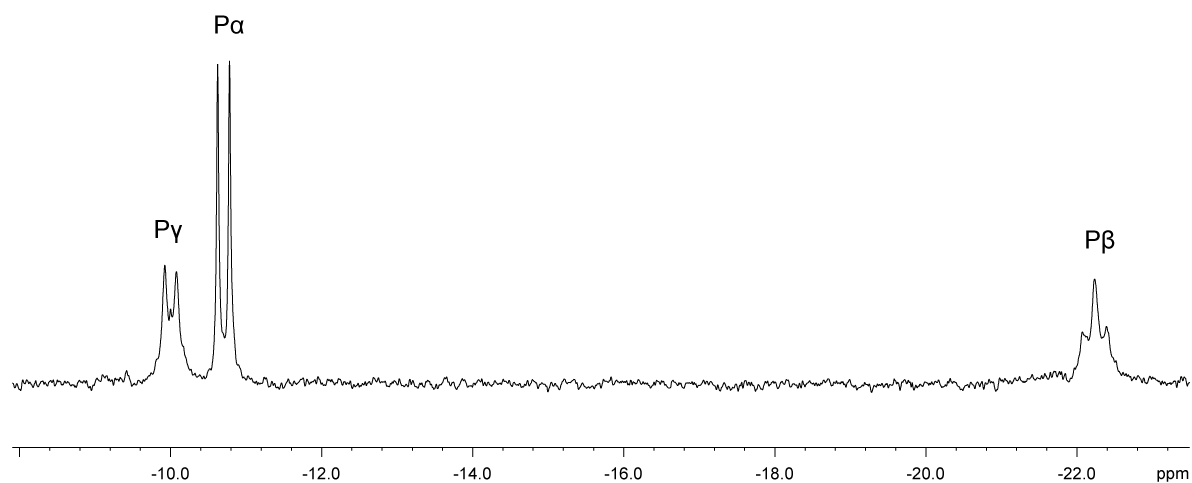

**Supporting Figure 7.**  $^{31}\text{P}$ -NMR spectrum (121 MHz,  $\text{D}_2\text{O}$ ) of 2'-methylseleno-2'-deoxycytidine 5'-triphosphate (**7**).

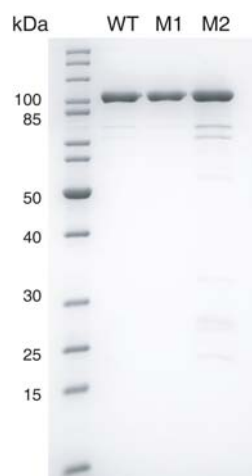

**Supporting Figure 8.** SDS-PAGE gel (12%) of expressed and purified T7 RNA polymerases (WT: wildtype; M1: Mutant 1 Y639F, H784A; M2: Mutant 2 Y639V, H784G, E593G, V685A).
